# Supplementary material
Source: publisher figshare collection journal article supplement (https://gsajournals.figshare.com/ndownloader/files/22616546)
Supplement: Supplementary file 1 [file 22616546]

Date	Treatment	Tube.label	PCR plate colum	PCR plate row	Sex	Infected	Researcher	Notes
20190903	YEAST	YEAST-01	1	A	F	I	MTJH
20190903	YEAST	YEAST-01	1	B	F	I	MTJH
20190903	YEAST	YEAST-01	1	C	F	I	MTJH
20190903	YEAST	YEAST-01	1	D	F	I	MTJH
20190903	YEAST	YEAST-01	1	E	F	I	MTJH
20190903	YEAST	YEAST-01	1	F	M	I	MTJH
20190903	YEAST	YEAST-01	1	G	M	I	MTJH
20190903	YEAST	YEAST-01	1	H	M	I	MTJH
20190903	YEAST	YEAST-01	2	A	M	I	MTJH
20190903	YEAST	YEAST-01	2	B	M	I	MTJH
20190903	YEAST	YEAST-06	2	C	F	I	MTJH
20190903	YEAST	YEAST-06	2	D	F	I	MTJH
20190903	YEAST	YEAST-06	2	E	F	I	MTJH
20190903	YEAST	YEAST-06	2	F	F	I	MTJH
20190903	YEAST	YEAST-06	2	G	F	I	MTJH
20190903	YEAST	YEAST-06	2	H	F	I	MTJH
20190903	YEAST	YEAST-06	3	A	F	I	MTJH
20190903	YEAST	YEAST-06	3	B	M	I	MTJH
20190903	YEAST	YEAST-06	3	C	M	I	MTJH
20190903	YEAST	YEAST-06	3	D	M	I	MTJH
20190903	YEAST	YEAST-09	3	E	F	I	MTJH
20190903	YEAST	YEAST-09	3	F	F	I	MTJH
20190903	YEAST	YEAST-09	3	G	F	I	MTJH
20190903	YEAST	YEAST-09	3	H	F	I	MTJH
20190903	YEAST	YEAST-09	4	A	M	I	MTJH
20190903	YEAST	YEAST-09	4	B	M	I	MTJH
20190903	YEAST	YEAST-09	4	C	M	I	MTJH
20190903	YEAST	YEAST-09	4	D	M	I	MTJH
20190903	YEAST	YEAST-09	4	E	M	I	MTJH
20190903	YEAST	YEAST-09	4	F	M	I	MTJH
20190903	YEAST	YEAST-14	4	G	F	I	MTJH
20190903	YEAST	YEAST-14	4	H	F	I	MTJH
20190903	YEAST	YEAST-14	5	A	F	I	MTJH
20190903	YEAST	YEAST-14	5	B	F	I	MTJH
20190903	YEAST	YEAST-14	5	C	F	I	MTJH
20190903	YEAST	YEAST-14	5	D	F	I	MTJH
20190903	YEAST	YEAST-14	5	E	M	I	MTJH
20190903	YEAST	YEAST-14	5	F	M	I	MTJH
20190903	YEAST	YEAST-14	5	G	M	I	MTJH
20190903	YEAST	YEAST-14	5	H	M	I	MTJH
20190903	YEAST	YEAST-21	6	A	F	I	MTJH
20190903	YEAST	YEAST-21	6	B	F	I	MTJH
20190903	YEAST	YEAST-21	6	C	F	I	MTJH
20190903	YEAST	YEAST-21	6	D	F	I	MTJH
20190903	YEAST	YEAST-21	6	E	F	I	MTJH
20190903	YEAST	YEAST-21	6	F	M	I	MTJH
20190903	YEAST	YEAST-21	6	G	M	I	MTJH
20190903	YEAST	YEAST-21	6	H	M	I	MTJH
20190903	YEAST	YEAST-21	7	A	M	I	MTJH
20190903	YEAST	YEAST-21	7	B	M	I	MTJH
20190903	YEAST	YEAST-22	7	C	F	I	MTJH
20190903	YEAST	YEAST-22	7	D	F	I	MTJH
20190903	YEAST	YEAST-22	7	E	F	I	MTJH
20190903	YEAST	YEAST-22	7	F	F	I	MTJH
20190903	YEAST	YEAST-22	7	G	F	I	MTJH
20190903	YEAST	YEAST-22	7	H	M	I	MTJH
20190903	YEAST	YEAST-22	8	A	M	I	MTJH
20190903	YEAST	YEAST-22	8	B	M	I	MTJH
20190903	YEAST	YEAST-22	8	C	M	I	MTJH
20190903	YEAST	YEAST-22	8	D	M	I	MTJH
20190903	YEAST	YEAST-25	8	E	F	I	MTJH
20190903	YEAST	YEAST-25	8	F	F	I	MTJH
20190903	YEAST	YEAST-25	8	G	F	I	MTJH
20190903	YEAST	YEAST-25	8	H	F	I	MTJH
20190903	YEAST	YEAST-25	9	A	F	I	MTJH
20190903	YEAST	YEAST-25	9	B	F	I	MTJH
20190903	YEAST	YEAST-25	9	C	M	I	MTJH
20190903	YEAST	YEAST-25	9	D	M	I	MTJH
20190903	YEAST	YEAST-25	9	E	M	I	MTJH
20190903	YEAST	YEAST-25	9	F	M	I	MTJH
20190903	YEAST	YEAST-26	9	G	F	I	MTJH
20190903	YEAST	YEAST-26	9	H	F	I	MTJH
20190903	YEAST	YEAST-26	10	A	F	I	MTJH
20190903	YEAST	YEAST-26	10	B	F	I	MTJH
20190903	YEAST	YEAST-26	10	C	F	I	MTJH
20190903	YEAST	YEAST-26	10	D	M	I	MTJH
20190903	YEAST	YEAST-26	10	E	M	I	MTJH
20190903	YEAST	YEAST-26	10	F	M	I	MTJH
20190903	YEAST	YEAST-26	10	G	M	I	MTJH
20190903	YEAST	YEAST-26	10	H	M	I	MTJH
20190903	YEAST	YEAST-27	11	A	F	I	MTJH
20190903	YEAST	YEAST-27	11	B	F	I	MTJH
20190903	YEAST	YEAST-27	11	C	F	I	MTJH
20190903	YEAST	YEAST-27	11	D	F	I	MTJH
20190903	YEAST	YEAST-27	11	E	F	I	MTJH
20190903	YEAST	YEAST-27	11	F	M	I	MTJH
20190903	YEAST	YEAST-27	11	G	M	I	MTJH
20190903	YEAST	YEAST-27	11	H	M	I	MTJH
20190903	YEAST	YEAST-27	12	A	M	I	MTJH
20190903	YEAST	YEAST-27	12	B	M	I	MTJH
20190903	YEAST	YEAST-31	12	C	F	I	MTJH
20190903	YEAST	YEAST-31	12	D	F	I	MTJH
20190903	YEAST	YEAST-31	12	E	M	I	MTJH
20190911	YEAST	YEAST-31	1	A	M	I	PHN
20190911	YEAST	YEAST-31	2	A	M	I	PHN
20190911	YEAST	YEAST-31	3	A	M	I	PHN
20190911	YEAST	YEAST-31	4	A	F	I	PHN
20190911	YEAST	YEAST-31	5	A	F	I	PHN
20190911	YEAST	YEAST-31	6	A	F	I	PHN
20190911	YEAST	YEAST-32	7	A	M	I	PHN
20190911	YEAST	YEAST-32	8	A	M	I	PHN
20190911	YEAST	YEAST-32	9	A	M	I	PHN
20190911	YEAST	YEAST-32	10	A	M	I	PHN
20190911	YEAST	YEAST-32	11	A	M	I	PHN
20190911	YEAST	YEAST-32	12	A	F	I	PHN
20190911	YEAST	YEAST-32	1	B	F	I	PHN
20190911	YEAST	YEAST-32	2	B	F	I	PHN
20190911	YEAST	YEAST-31	3	B	M	I	PHN
20190911	YEAST	YEAST-32	4	B	F	I	PHN
20190911	YEAST	YEAST-32	5	B	F	I	PHN
20190911	YEAST	YEAST-30	6	B	M	I	PHN
20190911	YEAST	YEAST-30	7	B	M	I	PHN
20190911	YEAST	YEAST-30	8	B	M	I	PHN
20190911	YEAST	YEAST-30	9	B	M	I	PHN
20190911	YEAST	YEAST-30	10	B	M	I	PHN
20190911	YEAST	YEAST-30	11	B	F	I	PHN
20190911	YEAST	YEAST-30	12	B	F	I	PHN
20190911	YEAST	YEAST-30	1	C	F	I	PHN
20190911	YEAST	YEAST-30	2	C	F	I	PHN
20190911	YEAST	YEAST-30	3	C	F	I	PHN
20190911	YEAST	YEAST-34	4	C	M	I	PHN
20190911	YEAST	YEAST-34	5	C	M	I	PHN
20190911	YEAST	YEAST-34	7	C	M	I	PHN
20190911	YEAST	YEAST-33	8	C	F	I	PHN
20190911	YEAST	YEAST-34	9	C	F	I	PHN
20190911	YEAST	YEAST-34	10	C	F	I	PHN
20190911	YEAST	YEAST-34	11	C	F	I	PHN
20190911	YEAST	YEAST-34	12	C	F	I	PHN
20190911	YEAST	YEAST-34	1	D	F	I	PHN
20190911	YEAST	YEAST-33	2	D	M	I	PHN
20190911	YEAST	YEAST-33	3	D	M	I	PHN
20190911	YEAST	YEAST-33	4	D	M	I	PHN
20190911	YEAST	YEAST-33	5	D	M	I	PHN
20190911	YEAST	YEAST-33	6	D	F	I	PHN
20190911	YEAST	YEAST-33	7	D	F	I	PHN
20190911	YEAST	YEAST-33	9	D	F	I	PHN
20190911	YEAST	YEAST-33	10	D	F	U	PHN
20190911	YEAST	YEAST-33	11	D	M	I	PHN
20190911	YEAST	YEAST-5	12	D	M	I	PHN
20190911	YEAST	YEAST-5	1	E	M	I	PHN
20190911	YEAST	YEAST-5	2	E	M	I	PHN
20190911	YEAST	YEAST-5	3	E	M	I	PHN
20190911	YEAST	YEAST-5	4	E	M	I	PHN
20190911	YEAST	YEAST-5	5	E	F	I	PHN
20190911	YEAST	YEAST-5	6	E	F	I	PHN
20190911	YEAST	YEAST-5	7	E	F	I	PHN
20190911	YEAST	YEAST-5	8	E	F	I	PHN
20190911	YEAST	YEAST-5	9	E	F	I	PHN
20190911	YEAST	YEAST-20	10	E	M	I	PHN
20190911	YEAST	YEAST-20	11	E	M	I	PHN
20190911	YEAST	YEAST-20	12	E	M	I	PHN
20190911	YEAST	YEAST-20	1	F	M	I	PHN
20190911	YEAST	YEAST-20	2	F	M	I	PHN
20190911	YEAST	YEAST-20	3	F	F	I	PHN
20190911	YEAST	YEAST-20	4	F	F	I	PHN
20190911	YEAST	YEAST-20	5	F	F	I	PHN
20190911	YEAST	YEAST-20	6	F	F	I	PHN
20190911	YEAST	YEAST-20	7	F	F	I	PHN
20190911	YEAST	YEAST-17	8	F	M	I	PHN
20190911	YEAST	YEAST-17	9	F	M	I	PHN
20190911	YEAST	YEAST-17	10	F	M	I	PHN
20190911	YEAST	YEAST-17	11	F	M	I	PHN
20190911	YEAST	YEAST-17	12	F	M	I	PHN
20190911	YEAST	YEAST-34	1	G	M	I	PHN
20190911	YEAST	YEAST-17	2	G	F	I	PHN
20190911	YEAST	YEAST-17	3	G	F	I	PHN
20190911	YEAST	YEAST-17	4	G	F	I	PHN
20190911	YEAST	YEAST-17	5	G	F	I	PHN
20190911	YEAST	YEAST-17	6	G	F	I	PHN
20190911	YEAST	YEAST-18	7	G	M	I	PHN
20190911	YEAST	YEAST-18	8	G	M	I	PHN
20190911	YEAST	YEAST-18	9	G	M	I	PHN
20190911	YEAST	YEAST-18	10	G	M	I	PHN
20190911	YEAST	YEAST-18	11	G	M	I	PHN
20190911	YEAST	YEAST-18	12	G	F	I	PHN
20190911	YEAST	YEAST-18	1	H	F	I	PHN
20190911	YEAST	YEAST-18	2	H	F	I	PHN
20190911	YEAST	YEAST-18	3	H	F	I	PHN
20190911	YEAST	YEAST-18	4	H	F	I	PHN
20190911	YEAST	YEAST-28	5	H	M	I	PHN
20190911	YEAST	YEAST-28	6	H	M	I	PHN
20190911	YEAST	YEAST-28	7	H	M	I	PHN
20190911	YEAST	YEAST-28	8	H	M	I	PHN
20190911	YEAST	YEAST-28	9	H	M	I	PHN
20191002	YEAST	YEAST-28	1	A	M	I	PHN
20191002	YEAST	YEAST-28	2	A	F	U	PHN
20191002	YEAST	YEAST-28	3	A	F	I	PHN
20191002	YEAST	YEAST-28	4	A	F	I	PHN
20191015	COLD	COLD-3	1	A	F	I	PHN	Weakly
20191015	COLD	COLD-3	2	A	F	I	PHN	Weakly
20191015	COLD	COLD-3	3	A	F	I	PHN	Weakly
20191015	COLD	COLD-3	4	A	F	I	PHN	Weakly
20191015	COLD	COLD-3	5	A	F	I	PHN	Weakly
20191015	COLD	COLD-3	6	A	M	I	PHN
20191015	COLD	COLD-3	7	A	M	I	PHN
20191015	COLD	COLD-3	8	A	M	I	PHN
20191015	COLD	COLD-3	9	A	M	U	PHN
20191015	COLD	COLD-3	10	A	M	I	PHN
20191015	COLD	COLD-7	11	A	F	I	PHN	Weakly
20191015	COLD	COLD-7	12	A	F	U	PHN
20191015	COLD	COLD-7	1	B	F	I	PHN	Weakly
20191015	COLD	COLD-7	2	B	F	U	PHN
20191015	COLD	COLD-7	3	B	F	U	PHN
20191015	COLD	COLD-7	4	B	M	I	PHN
20191015	COLD	COLD-7	5	B	M	I	PHN
20191015	COLD	COLD-7	6	B	M	I	PHN
20191015	COLD	COLD-7	7	B	M	I	PHN	Weakly
20191015	COLD	COLD-7	8	B	M	I	PHN
20191015	COLD	COLD-8	9	B	F	I	PHN
20191015	COLD	COLD-8	10	B	F	I	PHN
20191015	COLD	COLD-8	11	B	F	U	PHN
20191015	COLD	COLD-8	12	B	F	I	PHN	Weakly
20191015	COLD	COLD-8	1	C	F	I	PHN
20191015	COLD	COLD-8	2	C	M	I	PHN
20191015	COLD	COLD-8	3	C	M	I	PHN
20191015	COLD	COLD-8	4	C	M	I	PHN
20191015	COLD	COLD-8	5	C	M	I	PHN
20191015	COLD	COLD-8	6	C	M	I	PHN
20191015	COLD	COLD-9	7	C	F	U	PHN
20191015	COLD	COLD-9	8	C	F	I	PHN
20191015	COLD	COLD-9	9	C	F	I	PHN	Weakly
20191015	COLD	COLD-9	10	C	F	I	PHN	Weakly
20191015	COLD	COLD-9	11	C	F	I	PHN	VERY Weakly
20191015	COLD	COLD-9	12	C	M	I	PHN
20191015	COLD	COLD-9	1	D	M	I	PHN	Weakly
20191015	COLD	COLD-9	2	D	M	I	PHN	Weakly
20191015	COLD	COLD-9	3	D	M	I	PHN	Weakly
20191015	COLD	COLD-9	4	D	M	I	PHN	Weakly
20191015	COLD	COLD-11	5	D	F	U	PHN
20191015	COLD	COLD-11	6	D	F	I	PHN	Weakly
20191015	COLD	COLD-11	7	D	F	I	PHN	Weakly
20191015	COLD	COLD-11	8	D	F	I	PHN	Weakly
20191015	COLD	COLD-11	9	D	F	I	PHN	Weakly
20191015	COLD	COLD-11	10	D	M	I	PHN
20191015	COLD	COLD-11	11	D	M	I	PHN
20191015	COLD	COLD-11	12	D	M	I	PHN
20191015	COLD	COLD-11	1	E	M	I	PHN
20191015	COLD	COLD-11	2	E	M	I	PHN
20191015	COLD	COLD-12	3	E	F	U	PHN
20191015	COLD	COLD-12	4	E	F	U	PHN
20191015	COLD	COLD-12	5	E	F	I	PHN	Weakly
20191015	COLD	COLD-12	6	E	F	U	PHN
20191015	COLD	COLD-12	7	E	F	I	PHN
20191015	COLD	COLD-12	8	E	M	I	PHN
20191015	COLD	COLD-12	9	E	M	I	PHN
20191015	COLD	COLD-12	10	E	M	I	PHN
20191015	COLD	COLD-12	11	E	M	I	PHN
20191015	COLD	COLD-12	12	E	M	I	PHN
20191015	COLD	COLD-13	1	F	F	U	PHN
20191015	COLD	COLD-13	2	F	F	I	PHN	Weakly
20191015	COLD	COLD-13	3	F	F	I	PHN
20191015	COLD	COLD-13	4	F	F	I	PHN	Weakly
20191015	COLD	COLD-13	5	F	F	I	PHN	Weakly
20191015	COLD	COLD-13	6	F	M	I	PHN
20191015	COLD	COLD-13	7	F	M	I	PHN
20191015	COLD	COLD-13	8	F	M	I	PHN
20191015	COLD	COLD-13	9	F	M	I	PHN
20191015	COLD	COLD-13	10	F	M	I	PHN
20191015	COLD	COLD-16	11	F	F	I	PHN	Weakly
20191015	COLD	COLD-16	12	F	F	I	PHN	Weakly
20191015	COLD	COLD-16	1	G	F	I	PHN	Weakly
20191015	COLD	COLD-16	2	G	F	I	PHN
20191015	COLD	COLD-16	3	G	F	I	PHN
20191015	COLD	COLD-16	4	G	M	I	PHN
20191015	COLD	COLD-16	5	G	M	I	PHN
20191015	COLD	COLD-16	6	G	M	I	PHN
20191015	COLD	COLD-16	7	G	M	I	PHN
20191015	COLD	COLD-16	8	G	M	I	PHN
20191015	COLD	COLD-17	9	G	F	I	PHN
20191015	COLD	COLD-17	10	G	F	I	PHN
20191015	COLD	COLD-17	11	G	F	I	PHN
20191015	COLD	COLD-17	12	G	F	I	PHN	Weakly
20191015	COLD	COLD-17	1	H	F	I	PHN	Weakly
20191015	COLD	COLD-17	2	H	F	I	PHN
20191015	COLD	COLD-17	3	H	M	I	PHN
20191015	COLD	COLD-17	4	H	M	I	PHN
20191015	COLD	COLD-17	5	H	M	I	PHN
20191015	COLD	COLD-17	6	H	M	I	PHN
20191015	COLD	COLD-20	7	H	M	I	PHN
20191015	COLD	COLD-20	8	H	M	I	PHN
20191015	COLD	COLD-20	9	H	F	I	PHN
20191016	COLD	COLD-20	1	A	F	U	PHN
20191016	COLD	COLD-20	2	A	F	U	PHN
20191016	COLD	COLD-20	3	A	F	I	PHN	weakly
20191016	COLD	COLD-20	4	A	F	I	PHN	weakly
20191016	COLD	COLD-20	5	A	M	I	PHN
20191016	COLD	COLD-20	6	A	M	I	PHN
20191016	COLD	COLD-20	7	A	M	I	PHN
20191016	COLD	COLD-21	8	A	F	I	PHN	Weakly
20191016	COLD	COLD-21	9	A	F	I	PHN	Weakly
20191016	COLD	COLD-21	10	A	F	I	PHN	Weakly
20191016	COLD	COLD-21	11	A	F	I	PHN
20191016	COLD	COLD-21	12	A	F	I	PHN
20191016	COLD	COLD-21	1	B	M	I	PHN
20191016	COLD	COLD-21	2	B	M	I	PHN
20191016	COLD	COLD-21	3	B	M	I	PHN
20191016	COLD	COLD-21	4	B	M	I	PHN
20191016	COLD	COLD-21	5	B	M	I	PHN
20191016	COLD	COLD-23	6	B	F	I	PHN	Weakly
20191016	COLD	COLD-23	7	B	F	I	PHN
20191016	COLD	COLD-23	8	B	F	U	PHN
20191016	COLD	COLD-23	9	B	F	U	PHN
20191016	COLD	COLD-23	10	B	F	U	PHN
20191016	COLD	COLD-23	11	B	M	I	PHN
20191016	COLD	COLD-23	12	B	M	I	PHN
20191016	COLD	COLD-23	1	C	M	I	PHN
20191016	COLD	COLD-23	2	C	M	I	PHN
20191016	COLD	COLD-23	3	C	M	I	PHN	Weakly
20191016	COLD	COLD-24	4	C	F	I	PHN
20191016	COLD	COLD-24	5	C	F	I	PHN	Weakly
20191016	COLD	COLD-24	6	C	F	U	PHN
20191016	COLD	COLD-24	7	C	F	U	PHN
20191016	COLD	COLD-24	8	C	F	I	PHN
20191016	COLD	COLD-24	9	C	M	I	PHN
20191016	COLD	COLD-24	10	C	M	I	PHN
20191016	COLD	COLD-24	11	C	M	I	PHN
20191016	COLD	COLD-24	12	C	M	I	PHN
20191016	COLD	COLD-24	1	D	M	I	PHN
20191016	COLD	COLD-25	2	D	F	I	PHN	Weakly
20191016	COLD	COLD-25	3	D	F	U	PHN
20191016	COLD	COLD-25	4	D	F	U	PHN
20191016	COLD	COLD-25	5	D	F	I	PHN
20191016	COLD	COLD-25	6	D	F	U	PHN
20191016	COLD	COLD-25	7	D	M	I	PHN
20191016	COLD	COLD-25	8	D	M	I	PHN
20191016	COLD	COLD-25	9	D	M	I	PHN	Weakly
20191016	COLD	COLD-25	10	D	M	I	PHN
20191016	COLD	COLD-25	11	D	M	I	PHN	Weakly
20191016	COLD	COLD-26	12	D	F	I	PHN	Weakly
20191016	COLD	COLD-26	1	E	F	I	PHN
20191016	COLD	COLD-26	2	E	F	I	PHN
20191016	COLD	COLD-26	3	E	F	I	PHN
20191016	COLD	COLD-26	4	E	F	I	PHN	Weakly
20191016	COLD	COLD-26	5	E	M	I	PHN
20191016	COLD	COLD-26	6	E	M	I	PHN	Weakly
20191016	COLD	COLD-26	7	E	M	I	PHN	Weakly
20191016	COLD	COLD-26	8	E	M	I	PHN	Weakly
20191016	COLD	COLD-26	9	E	M	I	PHN
20191016	COLD	COLD-29	10	E	F	I	PHN	Weakly
20191016	COLD	COLD-29	11	E	F	I	PHN	VERY Weakly
20191016	COLD	COLD-29	12	E	F	U	PHN
20191016	COLD	COLD-29	1	F	F	I	PHN
20191016	COLD	COLD-29	2	F	F	I	PHN	Weakly
20191016	COLD	COLD-29	3	F	M	I	PHN
20191016	COLD	COLD-29	4	F	M	I	PHN
20191016	COLD	COLD-29	5	F	M	I	PHN
20191016	COLD	COLD-29	6	F	M	I	PHN
20191016	COLD	COLD-29	7	F	M	I	PHN
20191016	COLD	COLD-30	8	F	F	U	PHN
20191016	COLD	COLD-30	9	F	F	I	PHN
20191016	COLD	COLD-30	10	F	F	U	PHN
20191016	COLD	COLD-30	11	F	F	I	PHN	Very Weakly
20191016	COLD	COLD-30	12	F	F	I	PHN	Very Weakly
20191016	COLD	COLD-30	1	G	M	I	PHN
20191016	COLD	COLD-30	2	G	M	I	PHN
20191016	COLD	COLD-30	3	G	M	I	PHN
20191016	COLD	COLD-30	4	G	M	I	PHN
20191016	COLD	COLD-31	5	G	M	U	PHN
20191016	COLD	COLD-31	6	G	F	I	PHN
20191016	COLD	COLD-31	7	G	F	I	PHN
20191016	COLD	COLD-31	8	G	F	I	PHN
20191016	COLD	COLD-31	9	G	F	U	PHN
20191016	COLD	COLD-31	10	G	F	I	PHN
20191016	COLD	COLD-31	11	G	M	I	PHN
20191016	COLD	COLD-31	12	G	M	I	PHN
20191016	COLD	COLD-31	1	H	M	I	PHN
20191016	COLD	COLD-31	2	H	M	I	PHN
20191016	COLD	COLD-31	3	H	M	I	PHN
20191016	COLD	COLD-32	4	H	F	I	PHN
20191016	COLD	COLD-32	5	H	F	I	PHN
20191016	COLD	COLD-32	6	H	F	I	PHN
20191016	COLD	COLD-32	7	H	M	I	PHN
20191016	COLD	COLD-32	8	H	M	I	PHN
20191016	COLD	COLD-32	9	H	M	I	PHN
20191024	COLD	COLD-32	1	A	F	U	PHN
20191024	COLD	COLD-32	2	A	F	U	PHN
20191024	COLD	COLD-32	3	A	M	I	PHN
20191024	COLD	COLD-32	4	A	M	I	PHN
20191024	YEAST	YEAST-42	5	A	F	I	PHN
20191024	YEAST	YEAST-42	6	A	F	I	PHN
20191024	YEAST	YEAST-42	7	A	F	I	PHN
20191024	YEAST	YEAST-42	8	A	F	I	PHN	Weakly
20191024	YEAST	YEAST-42	9	A	M	I	PHN
20191024	YEAST	YEAST-42	10	A	M	I	PHN
20191024	YEAST	YEAST-42	11	A	M	I	PHN
20191024	YEAST	YEAST-42	12	A	M	I	PHN
20191024	YEAST	YEAST-42	1	B	M	I	PHN
20191024	YEAST	YEAST-43	2	B	F	I	PHN
20191024	YEAST	YEAST-43	3	B	F	I	PHN
20191024	YEAST	YEAST-43	4	B	F	I	PHN
20191024	YEAST	YEAST-43	5	B	F	I	PHN
20191024	YEAST	YEAST-43	6	B	F	I	PHN
20191024	YEAST	YEAST-43	7	B	F	I	PHN
20191024	YEAST	YEAST-43	8	B	M	I	PHN
20191024	YEAST	YEAST-43	9	B	M	I	PHN
20191024	YEAST	YEAST-43	10	B	M	I	PHN
20191024	YEAST	YEAST-43	11	B	M	I	PHN
20191024	YEAST	YEAST-44	12	B	F	I	PHN	Weakly
20191024	YEAST	YEAST-44	1	C	F	I	PHN	Weakly
20191024	YEAST	YEAST-44	2	C	F	I	PHN
20191024	YEAST	YEAST-44	3	C	F	I	PHN
20191024	YEAST	YEAST-44	4	C	F	I	PHN	Weakly
20191024	YEAST	YEAST-44	5	C	M	I	PHN
20191024	YEAST	YEAST-44	6	C	M	I	PHN
20191024	YEAST	YEAST-44	7	C	M	I	PHN	Weakly
20191024	YEAST	YEAST-44	8	C	M	I	PHN	Weakly
20191024	YEAST	YEAST-44	9	C	M	I	PHN
20191024	YEAST	YEAST-48	10	C	F	I	PHN
20191024	YEAST	YEAST-48	11	C	F	I	PHN
20191024	YEAST	YEAST-48	12	C	F	I	PHN	Weakly
20191024	YEAST	YEAST-48	1	D	F	I	PHN
20191024	YEAST	YEAST-48	2	D	M	I	PHN
20191024	YEAST	YEAST-48	3	D	M	I	PHN
20191024	YEAST	YEAST-48	4	D	M	I	PHN
20191024	YEAST	YEAST-48	5	D	M	I	PHN
20191024	YEAST	YEAST-48	6	D	M	I	PHN	Weakly
20191024	YEAST	YEAST-48	7	D	M	I	PHN
20191024	YEAST	YEAST-58	8	D	F	I	PHN
20191024	YEAST	YEAST-58	9	D	F	I	PHN
20191024	YEAST	YEAST-58	10	D	F	U	PHN
20191024	YEAST	YEAST-58	11	D	F	I	PHN
20191024	YEAST	YEAST-58	12	D	F	I	PHN
20191024	YEAST	YEAST-58	1	E	M	I	PHN
20191024	YEAST	YEAST-58	2	E	M	I	PHN
20191024	YEAST	YEAST-58	3	E	M	I	PHN
20191024	YEAST	YEAST-58	4	E	M	I	PHN
20191024	YEAST	YEAST-58	5	E	M	I	PHN
20191024	YEAST	YEAST-49	6	E	F	I	PHN
20191024	YEAST	YEAST-49	7	E	F	I	PHN
20191024	YEAST	YEAST-49	8	E	F	I	PHN	Weakly
20191024	YEAST	YEAST-49	9	E	F	I	PHN
20191024	YEAST	YEAST-49	10	E	F	I	PHN
20191024	YEAST	YEAST-49	11	E	M	I	PHN
20191024	YEAST	YEAST-49	12	E	M	I	PHN
20191024	YEAST	YEAST-49	1	F	M	I	PHN
20191024	YEAST	YEAST-49	2	F	M	I	PHN
20191024	YEAST	YEAST-49	3	F	M	I	PHN
20191024	YEAST	YEAST-54	4	F	F	I	PHN
20191024	YEAST	YEAST-54	5	F	F	I	PHN
20191024	YEAST	YEAST-54	6	F	F	I	PHN
20191024	YEAST	YEAST-54	7	F	F	I	PHN
20191024	YEAST	YEAST-54	8	F	F	I	PHN
20191024	YEAST	YEAST-54	9	F	M	I	PHN
20191024	YEAST	YEAST-54	10	F	M	I	PHN
20191024	YEAST	YEAST-54	11	F	M	I	PHN
20191024	YEAST	YEAST-54	12	F	M	I	PHN
20191024	YEAST	YEAST-54	1	G	M	I	PHN
20191024	YEAST	YEAST-61	2	G	F	I	PHN
20191024	YEAST	YEAST-61	3	G	F	I	PHN
20191024	YEAST	YEAST-61	4	G	F	I	PHN	Weakly
20191024	YEAST	YEAST-61	5	G	F	I	PHN
20191024	YEAST	YEAST-61	6	G	F	I	PHN
20191024	YEAST	YEAST-61	7	G	M	I	PHN
20191024	YEAST	YEAST-61	8	G	M	I	PHN
20191024	YEAST	YEAST-61	9	G	M	I	PHN
20191024	YEAST	YEAST-61	10	G	M	I	PHN
20191024	YEAST	YEAST-61	11	G	M	I	PHN
20191024	YEAST	YEAST-63	12	G	F	I	PHN
20191024	YEAST	YEAST-63	1	H	F	I	PHN
20191024	YEAST	YEAST-63	2	H	F	I	PHN
20191024	YEAST	YEAST-63	3	H	F	I	PHN
20191024	YEAST	YEAST-63	4	H	F	I	PHN
20191024	YEAST	YEAST-63	5	H	M	I	PHN
20191024	YEAST	YEAST-63	6	H	M	I	PHN
20191024	YEAST	YEAST-63	7	H	M	I	PHN
20191024	YEAST	YEAST-63	8	H	M	I	PHN
20191024	YEAST	YEAST-63	9	H	M	I	PHN
20191213	COLD	COLD-50	1	A	F	I	PHN	Weakly
20191213	COLD	COLD-50	2	A	M	I	PHN	Weakly
20191213	COLD	COLD-50	3	A	F	I	PHN	Weakly
20191213	COLD	COLD-50	4	A	M	I	PHN
20191213	COLD	COLD-50	5	A	F	I	PHN	Weakly
20191213	COLD	COLD-50	6	A	M	I	PHN
20191213	COLD	COLD-50	7	A	F	U	PHN
20191213	COLD	COLD-50	8	A	F	U	PHN
20191213	COLD	COLD-50	9	A	M	I	PHN
20191213	COLD	COLD-50	10	A	M	I	PHN
